# Supplementary material for: Shoot-root interaction in control of camalexin exudation in Arabidopsis
Source: bioRxiv or medRxiv preprint supplement (doi:10.1101/2020.12.15.422875), 2020-12-15
Supplement: Supplementary file [file media-1.pdf]

Supplemental Table 1. Primers used in the study

|   |                 | Gene ID          | Forward                | Reverse                  |
|---|-----------------|------------------|------------------------|--------------------------|
| 1 | <i>TIP41</i>    | <b>AT4G34270</b> | gaactggctgacaatggagtg  | atcaactctcagccaaaatcg    |
| 2 | <i>CYP71A12</i> | <b>AT2G30750</b> | tgtggtgtttggtccctatg   | ttgttcgtgagcagattgaga    |
| 3 | <i>CYP71A13</i> | <b>AT2G30770</b> | gatgttggtttgctccctatg  | ttgttggtgagcagattgaga    |
| 4 | <i>CYP71A27</i> | <b>AT4G20240</b> | ccctacggagaagattggaa   | ccagcttctctgtcattactttga |
| 5 | <i>CYP71A28</i> | <b>AT4G20235</b> | ttctcctctacggcgaata    | gaggagatggacagtgcataaa   |
| 6 | <i>CYP71B15</i> | <b>AT3G26830</b> | caccactgatcatctcaaagga | cggtcattccccatagtgtt     |
| 7 | <i>At</i>       | <b>AT4G26410</b> | gagctgaagtggcttccatgac | ggtccgacatacccatgatcc    |
| 8 | <i>Burk1</i>    | <b>NR042931</b>  | ggaactgcatttgactgg     | ctccccacgctttcgtgc       |
